# Supplementary material for: Phenotypic Characterisation for Growth and Nut Characteristics Revealed the Extent of Genetic Diversity in Wild Macadamia Germplasm
Source: MDPI journal article supplement (doi:10.3390/agriculture11070680), 2021-07-19
Supplement: s1 [file s1]

**Table S1** List of accessions for phenotyping*Accession with \*: No nuts**Accession with \*\*: No growth measurement*

| Species                | Accession | Locality       | Region            | Decimal<br>latitude | Decimal<br>longitude | No. of<br>trees |
|------------------------|-----------|----------------|-------------------|---------------------|----------------------|-----------------|
| Admixture              | 1015006   | Nambour, Qld   | Palmwoods         | -26.691             | 152.931              | 1               |
| Admixture              | 1030001   | Beenleigh, Qld | Upper Coomera     | -27.887             | 153.247              | 1               |
| Admixture              | 1030002   | Beenleigh, Qld | Upper Coomera     | -27.887             | 153.247              | 1               |
| Admixture              | 1030003   | Beenleigh, Qld | Upper Coomera     | -27.887             | 153.247              | 2               |
| Admixture              | 1030005   | Beenleigh, Qld | Upper Coomera     | -27.887             | 153.247              | 1               |
| Admixture              | 1030006   | Beenleigh, Qld | Upper Coomera     | -27.887             | 153.247              | 1               |
| Admixture              | 1031003   | Beenleigh, Qld | Guanda River Park | -27.938             | 153.248              | 1               |
| Admixture              | 1034001   | Beechmont, Qld | Beechmont         | -28.112             | 153.211              | 1               |
| Admixture              | 1040005   | Lismore, NSW   | The Channon       | -28.645             | 153.289              | 2               |
| Admixture              | 1040006   | Lismore, NSW   | The Channon       | -28.645             | 153.289              | 2               |
| Admixture              | 1094001   | Ballina, NSW   | Lennox Head       | -28.808             | 153.597              | 2               |
| Admixture              | 1109002   | Lismore, NSW   | Lismore           | -28.777             | 153.291              | 1               |
| Admixture              | 1112001   | Lismore, NSW   | Lismore           | -28.811             | 153.483              | 2               |
| Admixture              | 1089004*  | Nambour, Qld   | Belthorpe         | -26.841             | 152.724              | 1               |
| <i>M. integrifolia</i> | 1001001   | Gundiah, Qld   | Mount Bauple      | -25.821             | 152.585              | 1               |
| <i>M. integrifolia</i> | 1001003   | Gundiah, Qld   | Mount Bauple      | -25.821             | 152.585              | 1               |
| <i>M. integrifolia</i> | 1001004   | Gundiah, Qld   | Mount Bauple      | -25.821             | 152.585              | 2               |
| <i>M. integrifolia</i> | 1001005   | Gundiah, Qld   | Mount Bauple      | -25.821             | 152.585              | 2               |
| <i>M. integrifolia</i> | 1002001   | Gundiah, Qld   | Mount Bauple      | -25.827             | 152.588              | 6               |
| <i>M. integrifolia</i> | 1002002   | Gundiah, Qld   | Mount Bauple      | -25.827             | 152.588              | 1               |
| <i>M. integrifolia</i> | 1002003   | Gundiah, Qld   | Mount Bauple      | -25.827             | 152.588              | 2               |
| <i>M. integrifolia</i> | 1002004   | Gundiah, Qld   | Mount Bauple      | -25.827             | 152.588              | 2               |
| <i>M. integrifolia</i> | 1002005   | Gundiah, Qld   | Mount Bauple      | -25.827             | 152.588              | 1               |
| <i>M. integrifolia</i> | 1003002   | Gundiah, Qld   | Mount Bauple      | -25.807             | 152.585              | 1               |
| <i>M. integrifolia</i> | 1003003   | Gundiah, Qld   | Mount Bauple      | -25.807             | 152.585              | 1               |
| <i>M. integrifolia</i> | 1003004   | Gundiah, Qld   | Mount Bauple      | -25.807             | 152.585              | 8               |
| <i>M. integrifolia</i> | 1003005   | Gundiah, Qld   | Mount Bauple      | -25.807             | 152.585              | 3               |
| <i>M. integrifolia</i> | 1008002   | Gympie, Qld    | Amamoor           | -26.359             | 152.646              | 1               |

|                        |         |                 |            |         |         |   |
|------------------------|---------|-----------------|------------|---------|---------|---|
| <i>M. integrifolia</i> | 1008004 | Gympie, Qld     | Amamoor    | -26.359 | 152.646 | 1 |
| <i>M. integrifolia</i> | 1008005 | Gympie, Qld     | Amamoor    | -26.359 | 152.646 | 1 |
| <i>M. integrifolia</i> | 1008006 | Gympie, Qld     | Amamoor    | -26.359 | 152.646 | 1 |
| <i>M. integrifolia</i> | 1009001 | Gympie, Qld     | Mary River | -26.260 | 152.588 | 3 |
| <i>M. integrifolia</i> | 1009002 | Gympie, Qld     | Mary River | -26.260 | 152.588 | 2 |
| <i>M. integrifolia</i> | 1009003 | Gympie, Qld     | Mary River | -26.260 | 152.588 | 1 |
| <i>M. integrifolia</i> | 1009006 | Gympie, Qld     | Mary River | -26.260 | 152.588 | 1 |
| <i>M. integrifolia</i> | 1015001 | Nambour, Qld    | Palmwoods  | -26.691 | 152.931 | 2 |
| <i>M. integrifolia</i> | 1015002 | Nambour, Qld    | Palmwoods  | -26.691 | 152.931 | 1 |
| <i>M. integrifolia</i> | 1015003 | Nambour, Qld    | Palmwoods  | -26.691 | 152.931 | 1 |
| <i>M. integrifolia</i> | 1016001 | Nambour, Qld    | Palmwoods  | -26.688 | 152.931 | 1 |
| <i>M. integrifolia</i> | 1016006 | Nambour, Qld    | Palmwoods  | -26.688 | 152.931 | 1 |
| <i>M. integrifolia</i> | 1018001 | Nambour, Qld    | Montville  | -26.714 | 152.890 | 3 |
| <i>M. integrifolia</i> | 1018002 | Nambour, Qld    | Montville  | -26.714 | 152.890 | 2 |
| <i>M. integrifolia</i> | 1018003 | Nambour, Qld    | Montville  | -26.714 | 152.890 | 2 |
| <i>M. integrifolia</i> | 1018004 | Nambour, Qld    | Montville  | -26.714 | 152.890 | 2 |
| <i>M. integrifolia</i> | 1018005 | Nambour, Qld    | Montville  | -26.714 | 152.890 | 3 |
| <i>M. integrifolia</i> | 1018006 | Nambour, Qld    | Montville  | -26.714 | 152.890 | 1 |
| <i>M. integrifolia</i> | 1020001 | Caboolture, Qld | Mount Nebo | -27.369 | 152.814 | 8 |
| <i>M. integrifolia</i> | 1020002 | Caboolture, Qld | Mount Nebo | -27.369 | 152.814 | 1 |
| <i>M. integrifolia</i> | 1020004 | Caboolture, Qld | Mount Nebo | -27.369 | 152.814 | 1 |
| <i>M. integrifolia</i> | 1020006 | Caboolture, Qld | Mount Nebo | -27.369 | 152.814 | 1 |
| <i>M. integrifolia</i> | 1020007 | Caboolture, Qld | Mount Nebo | -27.369 | 152.814 | 3 |
| <i>M. integrifolia</i> | 1021006 | Caboolture, Qld | Mount Nebo | -27.390 | 152.789 | 1 |
| <i>M. integrifolia</i> | 1023001 | Beenleigh, Qld  | Mount Nebo | -27.618 | 153.205 | 1 |
| <i>M. integrifolia</i> | 1023002 | Beenleigh, Qld  | Mount Nebo | -27.618 | 153.205 | 3 |
| <i>M. integrifolia</i> | 1023003 | Beenleigh, Qld  | Mount Nebo | -27.618 | 153.205 | 4 |
| <i>M. integrifolia</i> | 1023004 | Beenleigh, Qld  | Mount Nebo | -27.618 | 153.205 | 1 |
| <i>M. integrifolia</i> | 1023005 | Beenleigh, Qld  | Mount Nebo | -27.618 | 153.205 | 4 |
| <i>M. integrifolia</i> | 1023006 | Beenleigh, Qld  | Mount Nebo | -27.618 | 153.205 | 1 |
| <i>M. integrifolia</i> | 1024001 | Beenleigh, Qld  | Mount Nebo | -27.617 | 153.217 | 1 |
| <i>M. integrifolia</i> | 1024002 | Beenleigh, Qld  | Mount Nebo | -27.617 | 153.217 | 1 |
| <i>M. integrifolia</i> | 1024005 | Beenleigh, Qld  | Mount Nebo | -27.617 | 153.217 | 2 |
| <i>M. integrifolia</i> | 1025001 | Beenleigh, Qld  | Belivah    | -27.756 | 153.180 | 1 |

|                        |         |                |                               |         |         |   |
|------------------------|---------|----------------|-------------------------------|---------|---------|---|
| <i>M. integrifolia</i> | 1025003 | Beenleigh, Qld | Belivah                       | -27.756 | 153.180 | 1 |
| <i>M. integrifolia</i> | 1025004 | Beenleigh, Qld | Belivah                       | -27.756 | 153.180 | 3 |
| <i>M. integrifolia</i> | 1025005 | Beenleigh, Qld | Belivah                       | -27.756 | 153.180 | 1 |
| <i>M. integrifolia</i> | 1025006 | Beenleigh, Qld | Belivah                       | -27.756 | 153.180 | 1 |
| <i>M. integrifolia</i> | 1027001 | Beenleigh, Qld | Ormeau                        | -27.835 | 153.224 | 1 |
| <i>M. integrifolia</i> | 1027002 | Beenleigh, Qld | Ormeau                        | -27.835 | 153.224 | 2 |
| <i>M. integrifolia</i> | 1027003 | Beenleigh, Qld | Ormeau                        | -27.835 | 153.224 | 1 |
| <i>M. integrifolia</i> | 1027004 | Beenleigh, Qld | Ormeau                        | -27.835 | 153.224 | 1 |
| <i>M. integrifolia</i> | 1027005 | Beenleigh, Qld | Ormeau                        | -27.835 | 153.224 | 1 |
| <i>M. integrifolia</i> | 1028001 | Beenleigh, Qld | Ormeau                        | -27.826 | 153.223 | 1 |
| <i>M. integrifolia</i> | 1028002 | Beenleigh, Qld | Ormeau                        | -27.826 | 153.223 | 4 |
| <i>M. integrifolia</i> | 1028003 | Beenleigh, Qld | Ormeau                        | -27.826 | 153.223 | 1 |
| <i>M. integrifolia</i> | 1028004 | Beenleigh, Qld | Ormeau                        | -27.826 | 153.223 | 2 |
| <i>M. integrifolia</i> | 1028005 | Beenleigh, Qld | Ormeau                        | -27.826 | 153.223 | 2 |
| <i>M. integrifolia</i> | 1032001 | Beechmont, Qld | Beechmont                     | -28.129 | 153.190 | 2 |
| <i>M. integrifolia</i> | 1032003 | Beechmont, Qld | Beechmont                     | -28.129 | 153.190 | 1 |
| <i>M. integrifolia</i> | 1032006 | Beechmont, Qld | Beechmont                     | -28.129 | 153.190 | 1 |
| <i>M. integrifolia</i> | 1034003 | Beechmont, Qld | Beechmont                     | -28.112 | 153.211 | 2 |
| <i>M. integrifolia</i> | 1053001 | Gundiah, Qld   | Mount Bauple<br>National Park | -25.794 | 152.586 | 5 |
| <i>M. integrifolia</i> | 1053002 | Gundiah, Qld   | Mount Bauple<br>National Park | -25.794 | 152.586 | 3 |
| <i>M. integrifolia</i> | 1053003 | Gundiah, Qld   | Mount Bauple<br>National Park | -25.794 | 152.586 | 3 |
| <i>M. integrifolia</i> | 1053004 | Gundiah, Qld   | Mount Bauple<br>National Park | -25.794 | 152.586 | 2 |
| <i>M. integrifolia</i> | 1053005 | Gundiah, Qld   | Mount Bauple<br>National Park | -25.794 | 152.586 | 2 |
| <i>M. integrifolia</i> | 1053006 | Gundiah, Qld   | Mount Bauple<br>National Park | -25.794 | 152.586 | 1 |
| <i>M. integrifolia</i> | 1054003 | Gundiah, Qld   | North Bauple                  | -25.800 | 152.563 | 3 |
| <i>M. integrifolia</i> | 1055002 | Gympie, Qld    | Marys Creek State<br>Forest   | -26.253 | 152.550 | 1 |

|                        |         |                 |                          |         |         |   |
|------------------------|---------|-----------------|--------------------------|---------|---------|---|
| <i>M. integrifolia</i> | 1055003 | Gympie, Qld     | Marys Creek State Forest | -26.253 | 152.550 | 1 |
| <i>M. integrifolia</i> | 1055005 | Gympie, Qld     | Marys Creek State Forest | -26.253 | 152.550 | 2 |
| <i>M. integrifolia</i> | 1055006 | Gympie, Qld     | Marys Creek State Forest | -26.253 | 152.550 | 1 |
| <i>M. integrifolia</i> | 1057001 | Gympie, Qld     | Mooloo                   | -26.319 | 152.611 | 1 |
| <i>M. integrifolia</i> | 1057002 | Gympie, Qld     | Mooloo                   | -26.319 | 152.611 | 1 |
| <i>M. integrifolia</i> | 1057004 | Gympie, Qld     | Mooloo                   | -26.319 | 152.611 | 2 |
| <i>M. integrifolia</i> | 1057006 | Gympie, Qld     | Mooloo                   | -26.319 | 152.611 | 1 |
| <i>M. integrifolia</i> | 1058006 | Gympie, Qld     | Amamoor                  | -26.345 | 152.654 | 2 |
| <i>M. integrifolia</i> | 1060001 | Numinbah, Qld   | Numinbah Valley          | -28.212 | 153.232 | 3 |
| <i>M. integrifolia</i> | 1060002 | Numinbah, Qld   | Numinbah Valley          | -28.212 | 153.232 | 1 |
| <i>M. integrifolia</i> | 1060003 | Numinbah, Qld   | Numinbah Valley          | -28.212 | 153.232 | 2 |
| <i>M. integrifolia</i> | 1060004 | Numinbah, Qld   | Numinbah Valley          | -28.212 | 153.232 | 1 |
| <i>M. integrifolia</i> | 1060005 | Numinbah, Qld   | Numinbah Valley          | -28.212 | 153.232 | 1 |
| <i>M. integrifolia</i> | 1071001 | Caboolture, Qld | Campbells Pocket         | -27.082 | 152.807 | 1 |
| <i>M. integrifolia</i> | 1071002 | Caboolture, Qld | Campbells Pocket         | -27.082 | 152.807 | 1 |
| <i>M. integrifolia</i> | 1073001 | Caboolture, Qld | Moorina                  | -27.172 | 152.860 | 1 |
| <i>M. integrifolia</i> | 1073005 | Caboolture, Qld | Moorina                  | -27.172 | 152.860 | 1 |
| <i>M. integrifolia</i> | 1075003 | Beenleigh, Qld  | Holland Park             | -27.518 | 153.083 | 2 |
| <i>M. integrifolia</i> | 1075004 | Beenleigh, Qld  | Holland Park             | -27.518 | 153.083 | 2 |
| <i>M. integrifolia</i> | 1076003 | Caboolture, Qld | Samford                  | -27.342 | 152.818 | 1 |
| <i>M. integrifolia</i> | 1076004 | Caboolture, Qld | Samford                  | -27.342 | 152.818 | 1 |
| <i>M. integrifolia</i> | 1076005 | Caboolture, Qld | Samford                  | -27.342 | 152.818 | 1 |
| <i>M. integrifolia</i> | 1076006 | Caboolture, Qld | Samford                  | -27.342 | 152.818 | 2 |
| <i>M. integrifolia</i> | 1077004 | Caboolture, Qld | Samford                  | -27.393 | 152.820 | 1 |
| <i>M. integrifolia</i> | 1077005 | Caboolture, Qld | Samford                  | -27.393 | 152.820 | 1 |
| <i>M. integrifolia</i> | 1089001 | Nambour, Qld    | Belthorpe                | -26.841 | 152.724 | 2 |
| <i>M. integrifolia</i> | 1089003 | Nambour, Qld    | Belthorpe                | -26.841 | 152.724 | 1 |
| <i>M. integrifolia</i> | 1090001 | Nambour, Qld    | Dulong                   | -26.652 | 152.901 | 2 |
| <i>M. integrifolia</i> | 1090002 | Nambour, Qld    | Dulong                   | -26.652 | 152.901 | 2 |
| <i>M. integrifolia</i> | 1090004 | Nambour, Qld    | Dulong                   | -26.652 | 152.901 | 2 |
| <i>M. integrifolia</i> | 1090005 | Nambour, Qld    | Dulong                   | -26.652 | 152.901 | 1 |

|                        |           |                   |                           |         |         |   |
|------------------------|-----------|-------------------|---------------------------|---------|---------|---|
| <i>M. integrifolia</i> | 1090006   | Nambour, Qld      | Dulong                    | -26.652 | 152.901 | 1 |
| <i>M. integrifolia</i> | 1090007   | Nambour, Qld      | Dulong                    | -26.652 | 152.901 | 2 |
| <i>M. integrifolia</i> | 1090008   | Nambour, Qld      | Dulong                    | -26.652 | 152.901 | 1 |
| <i>M. integrifolia</i> | 1101002   | Nambour, Qld      | Upper Caboolture          | -26.987 | 152.844 | 1 |
| <i>M. integrifolia</i> | 1101006   | Nambour, Qld      | Upper Caboolture          | -26.987 | 152.844 | 1 |
| <i>M. integrifolia</i> | 1102001   | Nambour, Qld      | Villeneuve                | -26.966 | 152.648 | 1 |
| <i>M. integrifolia</i> | 1103001   | Nambour, Qld      | Villeneuve                | -26.973 | 152.648 | 1 |
| <i>M. integrifolia</i> | 1103002   | Nambour, Qld      | Villeneuve                | -26.973 | 152.648 | 1 |
| <i>M. integrifolia</i> | 1103003   | Nambour, Qld      | Villeneuve                | -26.973 | 152.648 | 1 |
| <i>M. integrifolia</i> | 1103004   | Nambour, Qld      | Villeneuve                | -26.973 | 152.648 | 1 |
| <i>M. integrifolia</i> | 1106002   | Nambour, Qld      | Mapleton<br>Kenilworth    | -26.656 | 152.833 | 2 |
| <i>M. integrifolia</i> | 1001002*  | Gundiah, Qld      | Mount Bauple              | -25.821 | 152.585 | 1 |
| <i>M. integrifolia</i> | 1082002*  | Beenleigh, Qld    | Tingalpa                  | -27.613 | 153.204 | 1 |
| <i>M. jansenii</i>     | 1161001** | Gindoran, Qld     | Bulburin National<br>Park | -24.611 | 151.557 | 2 |
| <i>M. jansenii</i>     | 1161003** | Gindoran, Qld     | Bulburin National<br>Park | -24.611 | 151.557 | 1 |
| <i>M. jansenii</i>     | 1161004** | Gindoran, Qld     | Bulburin National<br>Park | -24.611 | 151.557 | 2 |
| <i>M. ternifolia</i>   | 1021001   | Caboolture, Qld   | Mount Nebo                | -27.390 | 152.789 | 1 |
| <i>M. ternifolia</i>   | 1021004   | Caboolture, Qld   | Mount Nebo                | -27.390 | 152.789 | 1 |
| <i>M. ternifolia</i>   | 1088001   | Nambour, Qld      | Woodford                  | -26.916 | 152.758 | 1 |
| <i>M. ternifolia</i>   | 1088002   | Nambour, Qld      | Woodford                  | -26.916 | 152.758 | 1 |
| <i>M. ternifolia</i>   | 1051001*  | Caboolture, Qld   | Draper                    | -27.354 | 152.916 | 1 |
| <i>M. ternifolia</i>   | 1071006*  | Caboolture, Qld   | Campbells Pocket          | -27.082 | 152.807 | 1 |
| <i>M. tetraphylla</i>  | 1016004   | Nambour, Qld      | Palmwoods                 | -26.688 | 152.931 | 1 |
| <i>M. tetraphylla</i>  | 1031001   | Beenleigh, Qld    | Guanda River Park         | -27.938 | 153.248 | 2 |
| <i>M. tetraphylla</i>  | 1031002   | Beenleigh, Qld    | Guanda River Park         | -27.938 | 153.248 | 5 |
| <i>M. tetraphylla</i>  | 1032004   | Beechmont, Qld    | Beechmont                 | -28.129 | 153.190 | 4 |
| <i>M. tetraphylla</i>  | 1036001   | Caboolture, Qld   | Mount Glorious            | -27.336 | 152.770 | 2 |
| <i>M. tetraphylla</i>  | 1036002   | Caboolture, Qld   | Mount Glorious            | -27.336 | 152.770 | 1 |
| <i>M. tetraphylla</i>  | 1036004   | Caboolture, Qld   | Mount Glorious            | -27.336 | 152.770 | 4 |
| <i>M. tetraphylla</i>  | 1037001   | Murwillumbah, NSW | Camp Bornhoffen           | -28.255 | 153.234 | 2 |

|                       |         |                    |                        |         |         |   |
|-----------------------|---------|--------------------|------------------------|---------|---------|---|
| <i>M. tetraphylla</i> | 1037002 | Murwillumbah, NSW  | Camp Bornhoffen        | -28.255 | 153.234 | 1 |
| <i>M. tetraphylla</i> | 1037003 | Murwillumbah, NSW  | Camp Bornhoffen        | -28.255 | 153.234 | 2 |
| <i>M. tetraphylla</i> | 1037004 | Murwillumbah, NSW  | Camp Bornhoffen        | -28.255 | 153.234 | 4 |
| <i>M. tetraphylla</i> | 1038003 | Murwillumbah, NSW  | Eungella               | -28.348 | 153.290 | 2 |
| <i>M. tetraphylla</i> | 1038005 | Murwillumbah, NSW  | Eungella               | -28.348 | 153.290 | 3 |
| <i>M. tetraphylla</i> | 1039001 | Murwillumbah, NSW  | Uki                    | -28.420 | 153.289 | 2 |
| <i>M. tetraphylla</i> | 1041003 | Murwillumbah, NSW  | Uki                    | -28.418 | 153.260 | 3 |
| <i>M. tetraphylla</i> | 1041004 | Murwillumbah, NSW  | Uki                    | -28.418 | 153.260 | 1 |
| <i>M. tetraphylla</i> | 1042004 | South Ballina, NSW | South Ballina          | -28.921 | 153.468 | 1 |
| <i>M. tetraphylla</i> | 1042005 | South Ballina, NSW | South Ballina          | -28.921 | 153.468 | 1 |
| <i>M. tetraphylla</i> | 1042006 | South Ballina, NSW | South Ballina          | -28.921 | 153.468 | 1 |
| <i>M. tetraphylla</i> | 1043002 | Lismore, NSW       | Tregeagle              | -28.861 | 153.370 | 2 |
| <i>M. tetraphylla</i> | 1043004 | Lismore, NSW       | Tregeagle              | -28.861 | 153.370 | 2 |
| <i>M. tetraphylla</i> | 1078004 | Murwillumbah, NSW  | Crystal Creek          | -28.252 | 153.299 | 2 |
| <i>M. tetraphylla</i> | 1078005 | Murwillumbah, NSW  | Crystal Creek          | -28.252 | 153.299 | 1 |
| <i>M. tetraphylla</i> | 1079001 | Murwillumbah, NSW  | Mount Warning<br>Road  | -28.386 | 153.336 | 3 |
| <i>M. tetraphylla</i> | 1079002 | Murwillumbah, NSW  | Mount Warning<br>Road  | -28.386 | 153.336 | 1 |
| <i>M. tetraphylla</i> | 1080005 | Murwillumbah, NSW  | Limpinwood Road        | -28.318 | 153.227 | 2 |
| <i>M. tetraphylla</i> | 1080006 | Murwillumbah, NSW  | Limpinwood Road        | -28.318 | 153.227 | 2 |
| <i>M. tetraphylla</i> | 1081001 | Murwillumbah, NSW  | Couchy Creek           | -28.285 | 153.263 | 1 |
| <i>M. tetraphylla</i> | 1085003 | Lismore, NSW       | Tuntable Creek<br>Road | -28.596 | 153.263 | 3 |
| <i>M. tetraphylla</i> | 1086001 | Lismore, NSW       | Lismore                | -28.601 | 153.259 | 4 |
| <i>M. tetraphylla</i> | 1086002 | Lismore, NSW       | Lismore                | -28.601 | 153.259 | 2 |
| <i>M. tetraphylla</i> | 1086004 | Lismore, NSW       | Lismore                | -28.601 | 153.259 | 1 |
| <i>M. tetraphylla</i> | 1086005 | Lismore, NSW       | Lismore                | -28.601 | 153.259 | 3 |
| <i>M. tetraphylla</i> | 1086006 | Lismore, NSW       | Lismore                | -28.601 | 153.259 | 3 |
| <i>M. tetraphylla</i> | 1087001 | Nimbin, NSW        | Nimbin                 | -28.599 | 153.259 | 2 |
| <i>M. tetraphylla</i> | 1093002 | Ballina, NSW       | Lennox Head            | -28.817 | 153.595 | 1 |
| <i>M. tetraphylla</i> | 1093005 | Ballina, NSW       | Lennox Head            | -28.817 | 153.595 | 2 |
| <i>M. tetraphylla</i> | 1094002 | Ballina, NSW       | Lennox Head            | -28.808 | 153.597 | 1 |
| <i>M. tetraphylla</i> | 1094003 | Ballina, NSW       | Lennox Head            | -28.808 | 153.597 | 1 |

|                       |          |                    |                     |         |         |   |
|-----------------------|----------|--------------------|---------------------|---------|---------|---|
| <i>M. tetraphylla</i> | 1094004  | Ballina, NSW       | Lennox Head         | -28.808 | 153.597 | 2 |
| <i>M. tetraphylla</i> | 1094005  | Ballina, NSW       | Lennox Head         | -28.808 | 153.597 | 1 |
| <i>M. tetraphylla</i> | 1094006  | Ballina, NSW       | Lennox Head         | -28.808 | 153.597 | 2 |
| <i>M. tetraphylla</i> | 1095004  | Mullumbimby, NSW   | Mullumbimby Creek   | -28.547 | 153.424 | 1 |
| <i>M. tetraphylla</i> | 1095006  | Mullumbimby, NSW   | Mullumbimby Creek   | -28.547 | 153.424 | 2 |
| <i>M. tetraphylla</i> | 1096001  | Mullumbimby, NSW   | Mullumbimby Creek   | -28.550 | 153.427 | 2 |
| <i>M. tetraphylla</i> | 1097001  | Mullumbimby, NSW   | Mullumbimby Creek   | -28.554 | 153.431 | 3 |
| <i>M. tetraphylla</i> | 1097005  | Mullumbimby, NSW   | Mullumbimby Creek   | -28.554 | 153.431 | 3 |
| <i>M. tetraphylla</i> | 1098003  | Murwillumbah, NSW  | Mooball             | -28.435 | 153.495 | 1 |
| <i>M. tetraphylla</i> | 1099001  | Murwillumbah, NSW  | Terranora Golf Club | -28.216 | 153.461 | 1 |
| <i>M. tetraphylla</i> | 1099006  | Murwillumbah, NSW  | Terranora Golf Club | -28.216 | 153.461 | 1 |
| <i>M. tetraphylla</i> | 1107004  | Nimbin, NSW        | Nimbin              | -28.618 | 153.264 | 1 |
| <i>M. tetraphylla</i> | 1160004  | Numinbah, Qld      | Numinbah Valley     | -28.212 | 153.232 | 2 |
| <i>M. tetraphylla</i> | 1016003* | Nambour, Qld       | Palmwoods           | -26.688 | 152.931 | 1 |
| <i>M. tetraphylla</i> | 1031006* | Beenleigh, Qld     | Guanda River Park   | -27.938 | 153.248 | 1 |
| <i>M. tetraphylla</i> | 1032002* | Beechmont, Qld     | Beechmont           | -28.129 | 153.190 | 1 |
| <i>M. tetraphylla</i> | 1036003* | Caboolture, Qld    | Mount Glorious      | -27.336 | 152.770 | 1 |
| <i>M. tetraphylla</i> | 1037005* | Murwillumbah, NSW  | Camp Bornhoffen     | -28.255 | 153.234 | 2 |
| <i>M. tetraphylla</i> | 1038001* | Murwillumbah, NSW  | Eungella            | -28.348 | 153.290 | 1 |
| <i>M. tetraphylla</i> | 1038004* | Murwillumbah, NSW  | Eungella            | -28.348 | 153.290 | 1 |
| <i>M. tetraphylla</i> | 1039002* | Murwillumbah, NSW  | Uki                 | -28.420 | 153.289 | 1 |
| <i>M. tetraphylla</i> | 1039003* | Murwillumbah, NSW  | Uki                 | -28.420 | 153.289 | 1 |
| <i>M. tetraphylla</i> | 1040001* | Lismore, NSW       | The Channon         | -28.645 | 153.289 | 1 |
| <i>M. tetraphylla</i> | 1040004* | Lismore, NSW       | The Channon         | -28.645 | 153.289 | 1 |
| <i>M. tetraphylla</i> | 1040007* | Lismore, NSW       | The Channon         | -28.645 | 153.289 | 2 |
| <i>M. tetraphylla</i> | 1041002* | Murwillumbah, NSW  | Uki                 | -28.418 | 153.260 | 1 |
| <i>M. tetraphylla</i> | 1041005* | Murwillumbah, NSW  | Uki                 | -28.418 | 153.260 | 1 |
| <i>M. tetraphylla</i> | 1041006* | Murwillumbah, NSW  | Uki                 | -28.418 | 153.260 | 1 |
| <i>M. tetraphylla</i> | 1042001* | South Ballina, NSW | South Ballina       | -28.921 | 153.468 | 1 |

|                       |          |                    |                     |         |         |   |
|-----------------------|----------|--------------------|---------------------|---------|---------|---|
| <i>M. tetraphylla</i> | 1042003* | South Ballina, NSW | South Ballina       | -28.921 | 153.468 | 1 |
| <i>M. tetraphylla</i> | 1043006* | Lismore, NSW       | Tregeagle           | -28.861 | 153.370 | 1 |
| <i>M. tetraphylla</i> | 1078006* | Murwillumbah, NSW  | Crystal Creek       | -28.252 | 153.299 | 2 |
| <i>M. tetraphylla</i> | 1079005* | Murwillumbah, NSW  | Mount Warning Road  | -28.386 | 153.336 | 1 |
| <i>M. tetraphylla</i> | 1080002* | Murwillumbah, NSW  | Limpinwood Road     | -28.318 | 153.227 | 2 |
| <i>M. tetraphylla</i> | 1080003* | Murwillumbah, NSW  | Limpinwood Road     | -28.318 | 153.227 | 1 |
| <i>M. tetraphylla</i> | 1081004* | Murwillumbah, NSW  | Couchy Creek        | -28.285 | 153.263 | 1 |
| <i>M. tetraphylla</i> | 1084001* | Nimbin, NSW        | Nimbin              | -28.588 | 153.218 | 1 |
| <i>M. tetraphylla</i> | 1084002* | Nimbin, NSW        | Nimbin              | -28.588 | 153.218 | 2 |
| <i>M. tetraphylla</i> | 1084003* | Nimbin, NSW        | Nimbin              | -28.588 | 153.218 | 2 |
| <i>M. tetraphylla</i> | 1085002* | Lismore, NSW       | Tuntable Creek Road | -28.596 | 153.263 | 1 |
| <i>M. tetraphylla</i> | 1086003* | Lismore, NSW       | Lismore             | -28.601 | 153.259 | 1 |
| <i>M. tetraphylla</i> | 1093001* | Ballina, NSW       | Lennox Head         | -28.817 | 153.595 | 1 |
| <i>M. tetraphylla</i> | 1093003* | Ballina, NSW       | Lennox Head         | -28.817 | 153.595 | 1 |
| <i>M. tetraphylla</i> | 1093006* | Ballina, NSW       | Lennox Head         | -28.817 | 153.595 | 1 |
| <i>M. tetraphylla</i> | 1095001* | Mullumbimby, NSW   | Mullumbimby Creek   | -28.547 | 153.424 | 1 |
| <i>M. tetraphylla</i> | 1095005* | Mullumbimby, NSW   | Mullumbimby Creek   | -28.547 | 153.424 | 1 |
| <i>M. tetraphylla</i> | 1096003* | Mullumbimby, NSW   | Mullumbimby Creek   | -28.550 | 153.427 | 1 |
| <i>M. tetraphylla</i> | 1096004* | Mullumbimby, NSW   | Mullumbimby Creek   | -28.550 | 153.427 | 1 |
| <i>M. tetraphylla</i> | 1098001* | Murwillumbah, NSW  | Mooball             | -28.435 | 153.495 | 1 |
| <i>M. tetraphylla</i> | 1098002* | Murwillumbah, NSW  | Mooball             | -28.435 | 153.495 | 1 |
| <i>M. tetraphylla</i> | 1098004* | Murwillumbah, NSW  | Mooball             | -28.435 | 153.495 | 1 |
| <i>M. tetraphylla</i> | 1098005* | Murwillumbah, NSW  | Mooball             | -28.435 | 153.495 | 1 |
| <i>M. tetraphylla</i> | 1098006* | Murwillumbah, NSW  | Mooball             | -28.435 | 153.495 | 1 |
| <i>M. tetraphylla</i> | 1099003* | Murwillumbah, NSW  | Terranora Golf Club | -28.216 | 153.461 | 1 |
| <i>M. tetraphylla</i> | 1099004* | Murwillumbah, NSW  | Terranora Golf Club | -28.216 | 153.461 | 1 |
| <i>M. tetraphylla</i> | 1100001* | Beenleigh, Qld     | Clagiraba Creek     | -27.997 | 153.258 | 1 |



|                       |          |               |                        |         |         |   |
|-----------------------|----------|---------------|------------------------|---------|---------|---|
| <i>M. tetraphylla</i> | 1106003* | Nambour, Qld  | Mapleton<br>Kenilworth | -26.656 | 152.833 | 1 |
| <i>M. tetraphylla</i> | 1107001* | Nimbin, NSW   | Nimbin                 | -28.618 | 153.264 | 1 |
| <i>M. tetraphylla</i> | 1107002* | Nimbin, NSW   | Nimbin                 | -28.618 | 153.264 | 1 |
| <i>M. tetraphylla</i> | 1107003* | Nimbin, NSW   | Nimbin                 | -28.618 | 153.264 | 1 |
| <i>M. tetraphylla</i> | 1110001* | Lismore, NSW  | Dorroughby             | -28.662 | 153.370 | 1 |
| <i>M. tetraphylla</i> | 1111002* | Lismore, NSW  | Tintenbar              | -28.784 | 153.463 | 1 |
| <i>M. tetraphylla</i> | 1112004* | Lismore, NSW  | Lismore                | -28.811 | 153.483 | 1 |
| <i>M. tetraphylla</i> | 1160001* | Numinbah, Qld | Numinbah Valley        | -28.212 | 153.232 | 2 |
| <i>M. tetraphylla</i> | 1160002* | Numinbah, Qld | Numinbah Valley        | -28.212 | 153.232 | 2 |
| <i>M. tetraphylla</i> | 1160005* | Numinbah, Qld | Numinbah Valley        | -28.212 | 153.232 | 1 |
| <i>M. tetraphylla</i> | 1160006* | Numinbah, Qld | Numinbah Valley        | -28.212 | 153.232 | 1 |

---
