# Supplementary material for: Phenotypic Characterisation for Growth and Nut Characteristics Revealed the Extent of Genetic Diversity in Wild Macadamia Germplasm
Source: MDPI journal article supplement (doi:10.3390/agriculture11070680), 2021-07-19
Supplement: s1 [file s1]

**Table S2** Principal component (PC) coefficients of all traits.

*For each variable, the highest loading values for first three components are in bold.*

| Traits/Components          | PC1          | PC2           | PC3           |
|----------------------------|--------------|---------------|---------------|
| HGT                        | 0.218        | <b>-0.409</b> | 0.033         |
| TC                         | 0.205        | <b>-0.478</b> | 0.058         |
| CL                         | 0.175        | <b>-0.460</b> | 0.127         |
| CW                         | 0.172        | <b>-0.478</b> | 0.027         |
| NWt                        | <b>0.392</b> | 0.169         | 0.102         |
| NL                         | 0.351        | 0.193         | 0.102         |
| NW                         | <b>0.376</b> | 0.161         | 0.188         |
| STH                        | 0.325        | 0.109         | -0.277        |
| STE                        | 0.304        | 0.064         | <b>-0.398</b> |
| SWt                        | <b>0.386</b> | 0.166         | -0.052        |
| KWt                        | 0.253        | 0.165         | <b>0.524</b>  |
| KR                         | -0.147       | 0.037         | <b>0.640</b>  |
| Proportion of variance (%) | 46.3         | 19.8          | 15.7          |
| Cumulative proportion (%)  | 46.3         | 66.1          | 81.7          |

HGT = height, TC = Trunk circumference, CL = Canopy length, CW = Canopy width, NWt = Nut weight, NL = Nut length, NW = Nut width, STH = Shell thickness at hilum, STE = Shell thickness at equator, SWt = Shell weight, KWt = Kernel weight, KR = Kernel recovery
