# Supplementary figures and images for: Phenotypic Characterisation for Growth and Nut Characteristics Revealed the Extent of Genetic Diversity in Wild Macadamia Germplasm
Source: MDPI journal article supplement (doi:10.3390/agriculture11070680), 2021-07-19

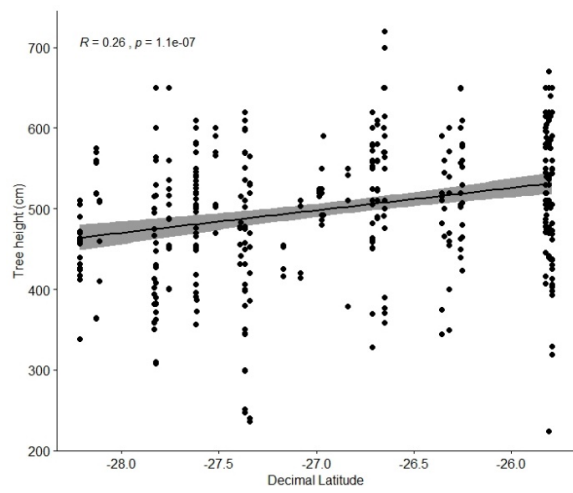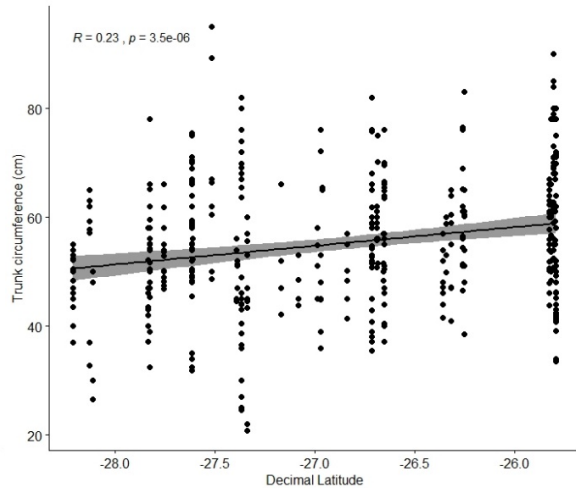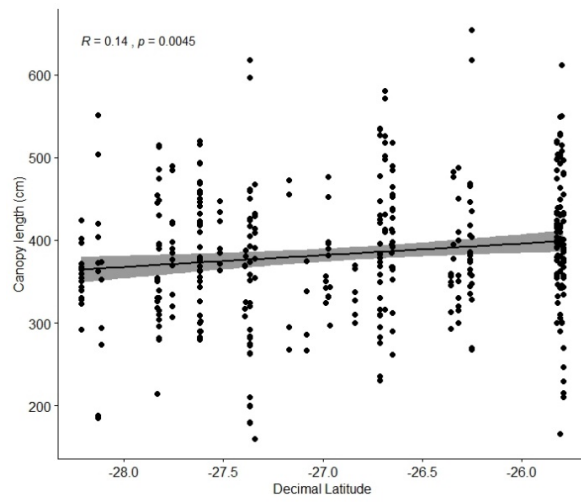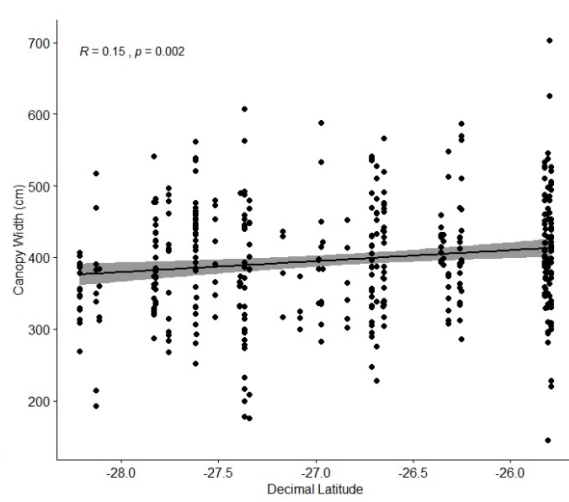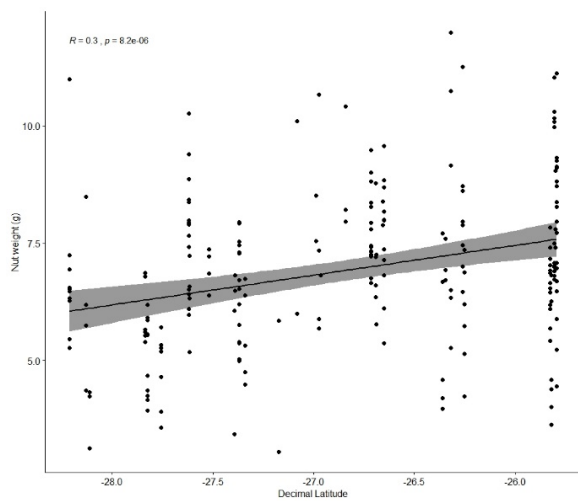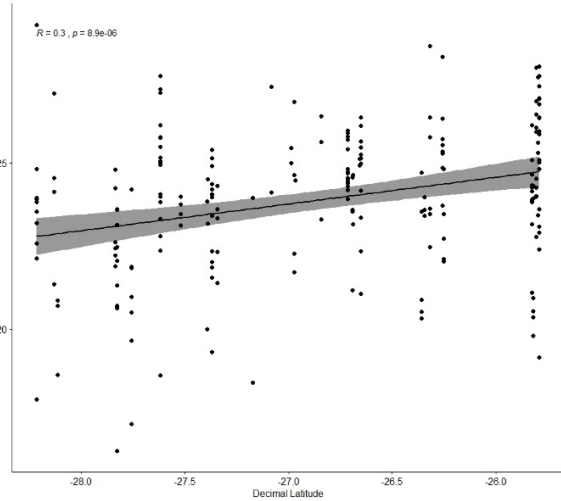

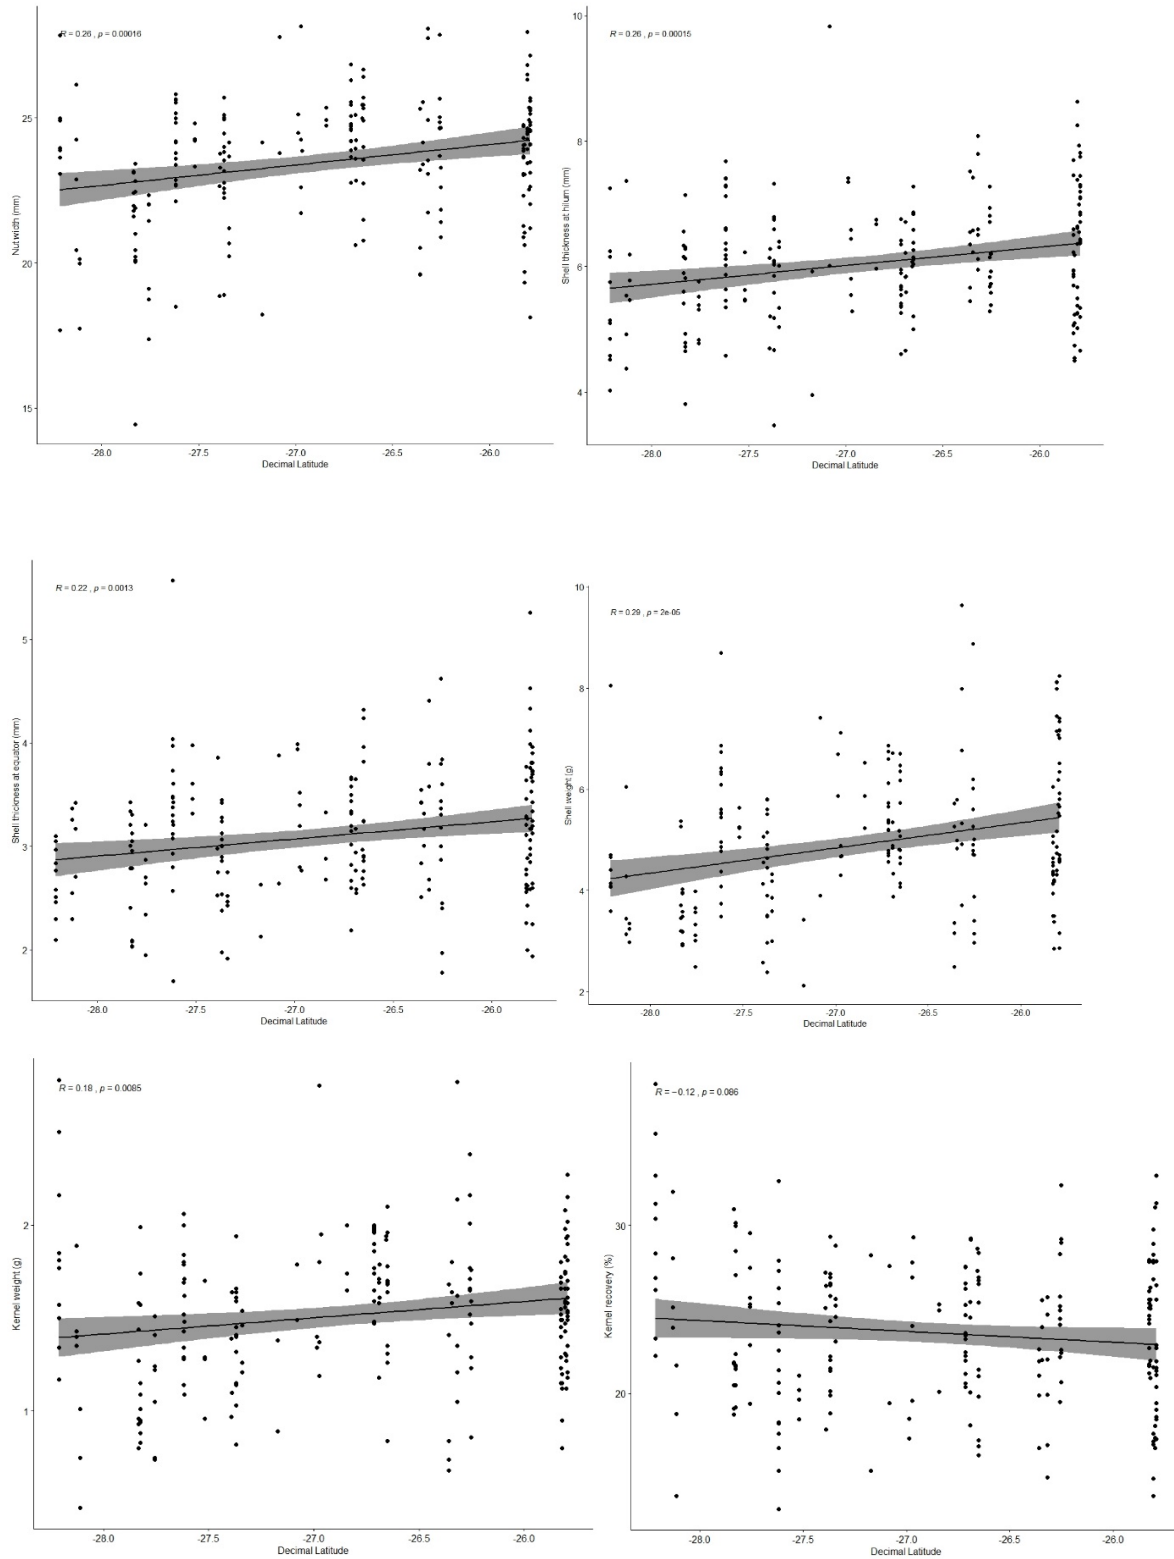

**Figure S1** Correlation between predicted values of the traits and latitude in *M. integrifolia*

Supplement: s1 [file s1]

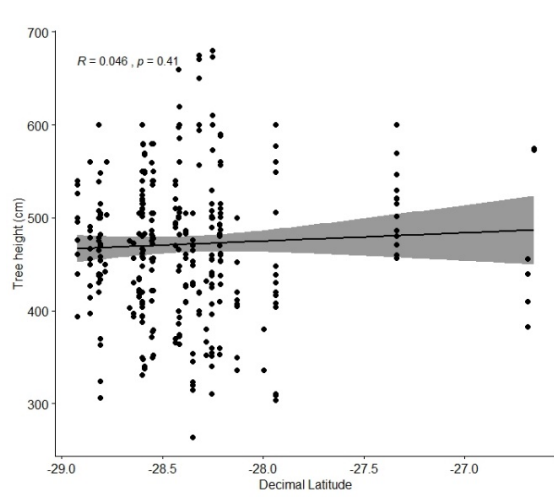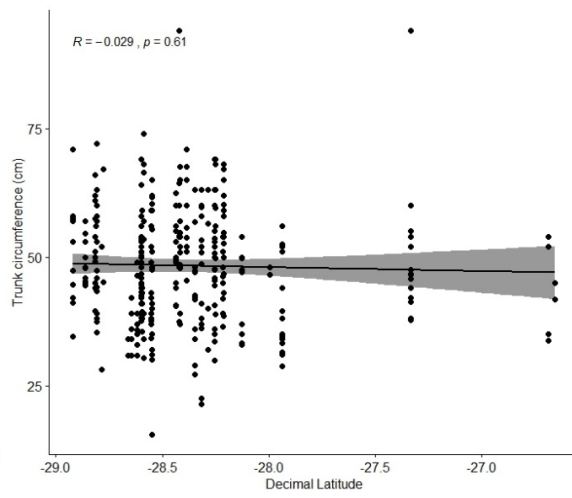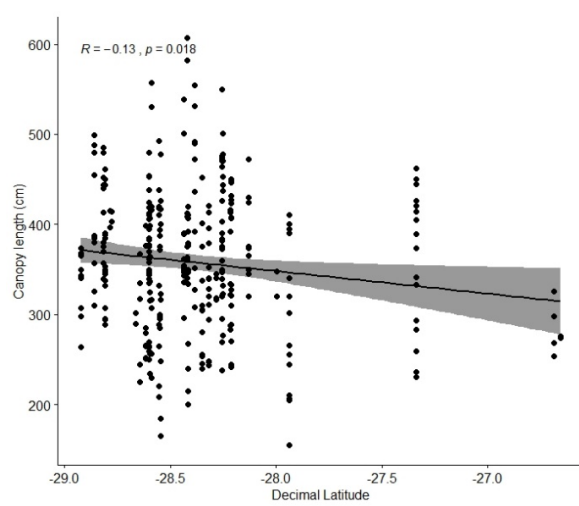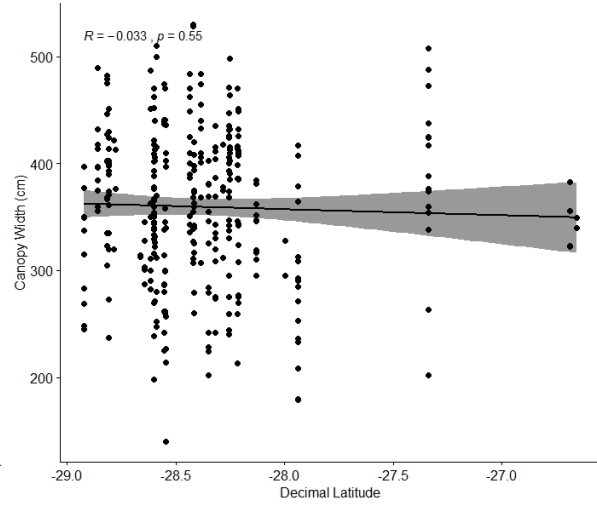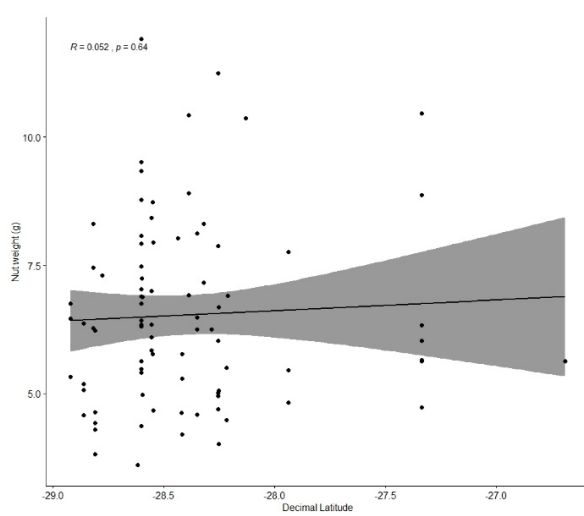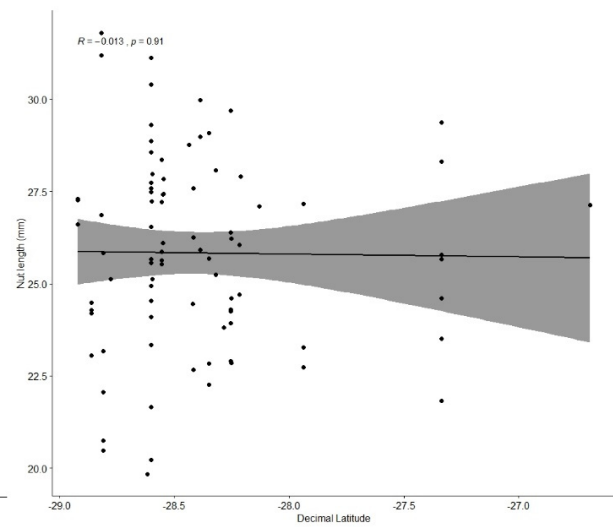

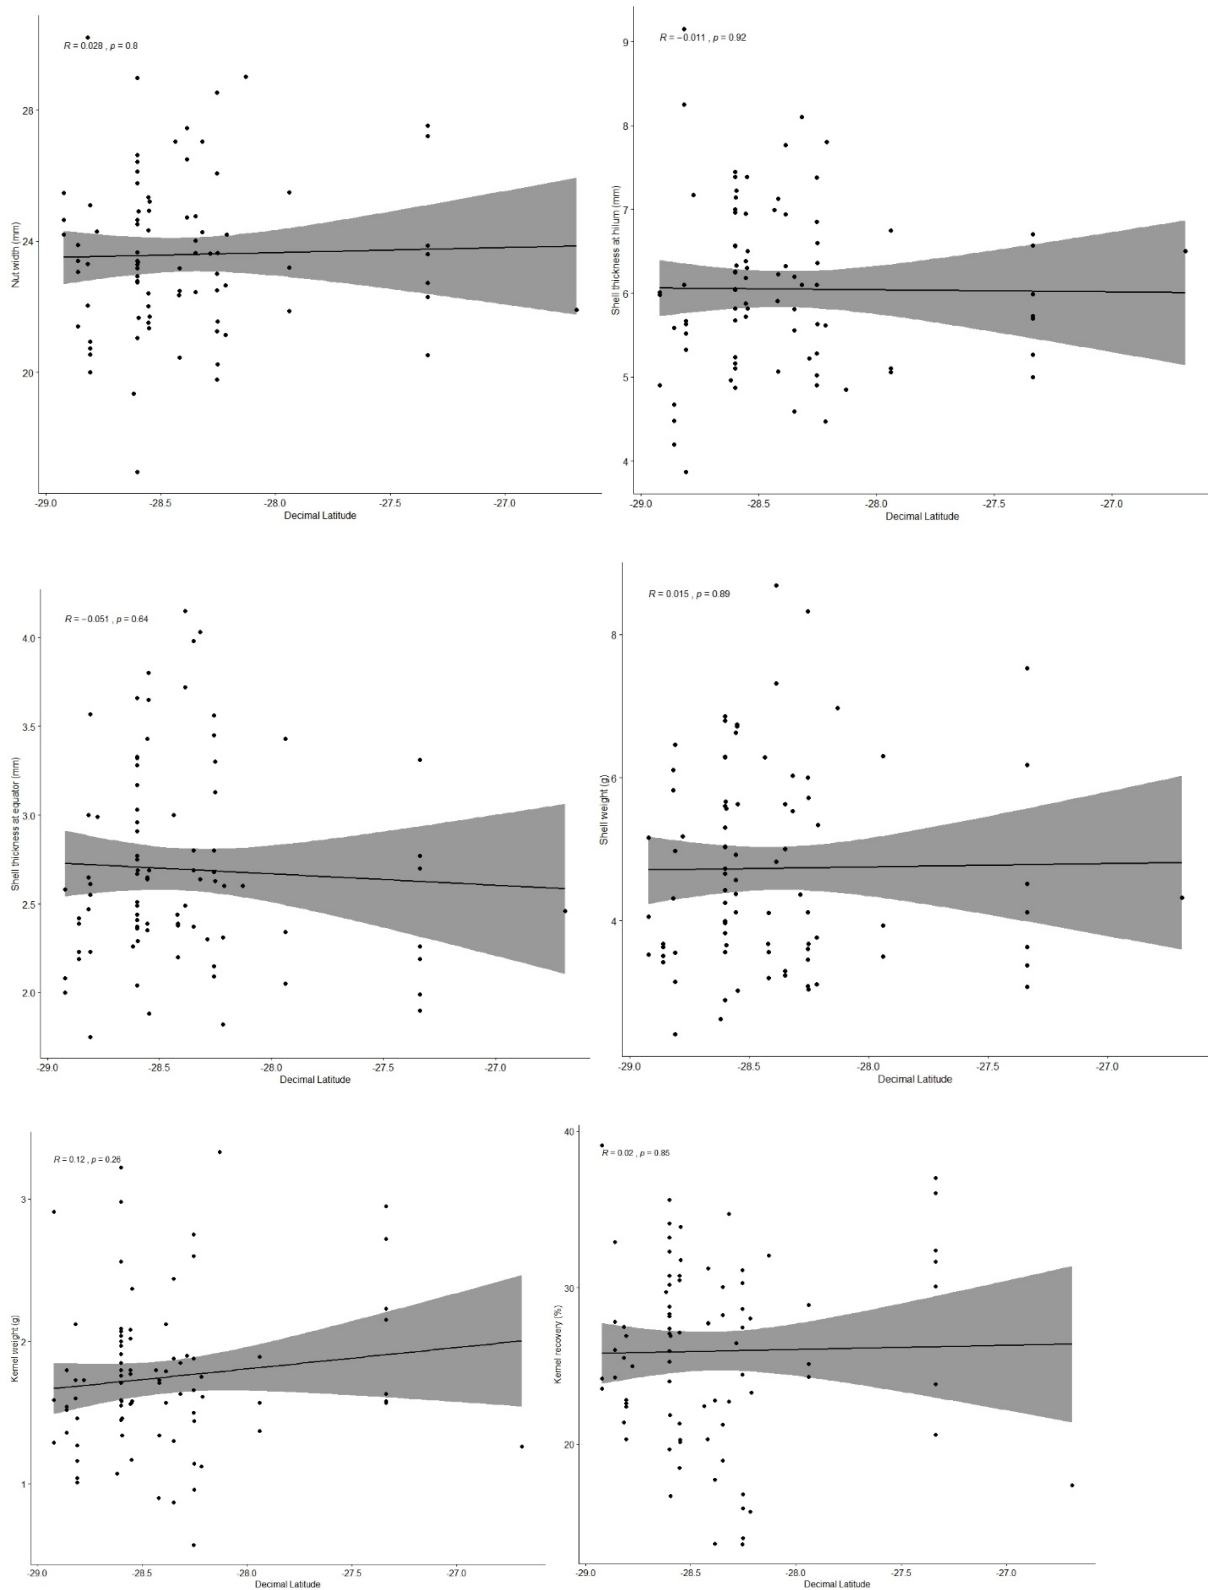

**Figure S2** Correlation between predicted values of the traits and latitude in *M. tetraphylla*

Supplement: s1 [file s1]
